# Supplementary material for: Superconducting tantalum disulfide nanotapes; growth, structure and stoichiometry
Source: Royal Society of Chemistry journal article supplement (doi:10.1039/b9nr00224c), 2009-11-03
Supplement: b9nr00224c.pdf [file b9nr00224c.pdf]

## Superconducting tantalum disulfide nanotapes; growth, structure and stoichiometry.

Charles W. Dunnill<sup>a</sup>, Ian Maclaren<sup>b</sup> and Duncan H. Gregory<sup>\*a</sup>

*Electronic Supplementary Information (ESI):*

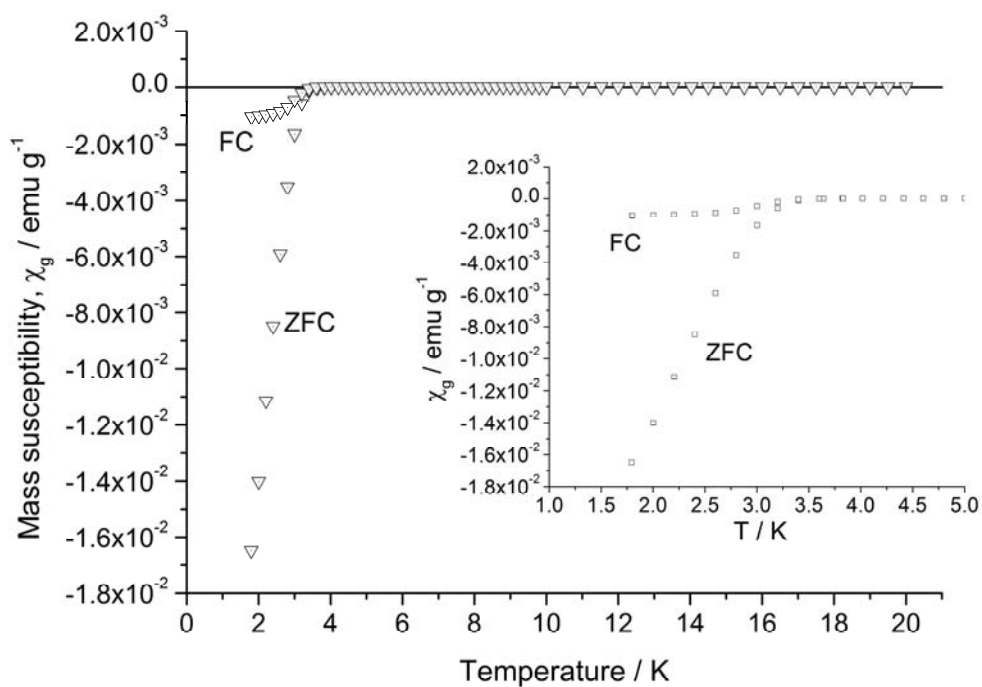

**Figure S1** Plot of mass susceptibility vs. temperature for nanowires of 2H-TaS<sub>2</sub> (3).
